# Supplementary material for: Digital Interventions to Reduce Sedentary Behaviors of Office Workers: Scoping Review
Source: PubMed Central journal article supplement (PMC6383116; doi:10.2196/11079), 2019-02-07
Supplement: jmir_v21i2e11079_app1.pdf [file jmir_v21i2e11079_app1.pdf]

## MEDLINE Search Strategy

| #  | search term                                                                                                                                                                                                                                                                                                                                            | fields searched  | notes for each search                                 | hits    |
|----|--------------------------------------------------------------------------------------------------------------------------------------------------------------------------------------------------------------------------------------------------------------------------------------------------------------------------------------------------------|------------------|-------------------------------------------------------|---------|
| 1  | exp Internet/ or exp Computers, Handheld/ or exp Telemedicine/ or exp Cell Phones/                                                                                                                                                                                                                                                                     | subject headings | different digital media                               | 93,517  |
| 2  | exp Monitoring, Physiologic/ or exp Monitoring, Ambulatory/ or exp accelerometry                                                                                                                                                                                                                                                                       | subject headings | monitoring techniques                                 | 158,104 |
| 3  | ((mobile or smart or cell) adj2 (app or phone* or telephone* or technolog*)) or pedometer* or accelerometer* or Bluetooth or wireless or ((digital or connected) adj2 (health)) or (mhealth) or (ehealth) or ((information* or digital) adj3 (technolog* or media)) or (software) or ((computer* or screen?) adj2 prompt*) or(email*) or(website*).mp. | keyword          | different digital media, devices and applications     | 55,007  |
| 4  | #1 or #2 or #3                                                                                                                                                                                                                                                                                                                                         |                  | <b>involving digital tech</b>                         | 284,380 |
| 5  | (sedentary or sitting or screen time or computer time).mp.                                                                                                                                                                                                                                                                                             | keyword          | <b>involving SB or related behaviours</b>             | 44,890  |
| 6  | #4 and #5                                                                                                                                                                                                                                                                                                                                              |                  | tech for SB                                           | 3,811   |
| 7  | ("office work*" or white-collar or worksite* or workplace* or occupational health).mp.                                                                                                                                                                                                                                                                 | keyword          | <b>focused on office workers or workplace context</b> | 46,988  |
| 8  | #6 and #7                                                                                                                                                                                                                                                                                                                                              |                  | tech used on office workers for SB-related purposes   | 140     |
| 9  | (jitai or "just in time adaptive intervention").mp.                                                                                                                                                                                                                                                                                                    | keyword          |                                                       | 18      |
| 10 | #8 or #9                                                                                                                                                                                                                                                                                                                                               |                  | include JITAI                                         | 156     |
| 11 | limit 10 to (yr="2000 - 2017" and english)                                                                                                                                                                                                                                                                                                             |                  | published in 2000 - 2017, and in English              | 152     |

## Ei Compendex Search Strategy

| # | search term                                                                                                                                                                                                                                                                               | fields searched    | notes for each search                                                               | hits      |
|---|-------------------------------------------------------------------------------------------------------------------------------------------------------------------------------------------------------------------------------------------------------------------------------------------|--------------------|-------------------------------------------------------------------------------------|-----------|
| 1 | ((digital media OR Internet OR web OR smartphone OR wearable OR acceleromet* OR pedometer OR Bluetooth OR wireless OR intelligent OR sensor OR sensing OR computing OR {m-health} OR {e-health} OR software OR {internet of thing} OR {IoT}) WN KY)                                       | title/abstract/key | <b>involving digital tech</b>                                                       | 5,761,508 |
| 2 | ((reduce OR increase OR decrease OR improve OR change OR modify OR modify OR encourage OR discourage OR motivate OR persuade OR prompt OR remind OR mitigate OR manipulate) AND (sedentary OR inactivity OR sitting OR {computer work} OR {office work} OR {desk work} OR break )) WN KY) | title/abstract/key | <b>changing SB or related behaviours</b>                                            | 47,677    |
| 3 | {{office worker} OR {working age} OR workplace* OR worksite* OR employee* OR adult* NOT teenag* NOT child* NOT elderly NOT adolescen* NOT student*)WN KY                                                                                                                                  | title/abstract/key | <b>involving office workers or related populations</b>                              | 86,750    |
| 4 | #1 AND #2 AND #3                                                                                                                                                                                                                                                                          |                    | tech for changing SB or related behaviours in office workers or related populations | 164       |

|   |                                                                                            |                    |                                          |     |
|---|--------------------------------------------------------------------------------------------|--------------------|------------------------------------------|-----|
| 5 | #4 NOT ((1998 OR 1997 OR 1995 OR 1993 OR 1992 OR 1986 OR 1976) WN YR) AND({english} WN LA) | years and language | published in 2000 - 2017, and in English | 155 |
|---|--------------------------------------------------------------------------------------------|--------------------|------------------------------------------|-----|

### Scopus search strategy

| # | search term                                                                                                                                                                                                                                                                                          | fields searched         | notes for each search                                                               | hits      |
|---|------------------------------------------------------------------------------------------------------------------------------------------------------------------------------------------------------------------------------------------------------------------------------------------------------|-------------------------|-------------------------------------------------------------------------------------|-----------|
| 1 | TITLE-ABS-KEY ( ("digital medi*" OR internet OR web OR smartphone OR wearable OR acceleromet* OR pedometer OR Bluetooth OR wireless OR intelligent OR sensor OR sensing OR computing OR "m-health" OR "e-health" OR software OR "internet of thing" OR "IoT" ) )                                     | title/abstract/key word | <b>involving digital tech</b>                                                       | 4,054,597 |
| 2 | TITLE-ABS-KEY((reduce OR increase OR decrease OR improve OR change OR modify OR modify OR encourage OR discourage OR motivate OR persuade OR prompt OR remind OR mitigate OR manipulate OR "break up" ) W/1 (sedentary OR inactivity OR sitting OR "computer work" OR "office work" OR "desk work")) | title/abstract/key word | <b>changing SB or related behaviours</b>                                            | 1,768     |
| 3 | TITLE-ABS-KEY("office work*" OR "working age" OR workplace* OR worksite* OR employee* OR adult* AND NOT teenag* AND NOT child* AND NOT adolescen* AND NOT student*)                                                                                                                                  |                         | <b>involving office workers or related populations</b>                              | 5,629,832 |
| 4 | #1 AND #2 AND #3                                                                                                                                                                                                                                                                                     |                         | tech for changing SB or related behaviours in office workers or related populations | 153       |
| 5 | #4 AND NOT INDEX(medline)                                                                                                                                                                                                                                                                            |                         | excluding MEDLINE indexed                                                           | 53        |

|   |                                                                                       |  |                                             |    |
|---|---------------------------------------------------------------------------------------|--|---------------------------------------------|----|
| 6 | #5 AND ( LIMIT-TO ( LANGUAGE , "English" ) ) AND<br>PUBYEAR > 1999 AND PUBYEAR < 2018 |  | published in 2000 - 2017, and<br>in English | 51 |
|---|---------------------------------------------------------------------------------------|--|---------------------------------------------|----|

### ACM Digital Library search terms

| # | search term                                                                                                         | fields searched     | notes for each search                                                | hits |
|---|---------------------------------------------------------------------------------------------------------------------|---------------------|----------------------------------------------------------------------|------|
| 1 | sedentary sitting break) AND acmdlTitle:(combat<br>persuade remind change reduce increase motivate<br>intervention) | full-text and abstr | simple search of articles on<br>changing SB or related<br>behaviours | 102  |
| 2 | filter: {"publicationYear":{"gte":2000, "lte":2017}}                                                                |                     | published in 2000 - 2017                                             | 85   |

Note on red coloured search terms: In the medical/health sciences literature, we were particularly interested in the appropriateness and acceptability of different digital SB interventions in office-based workplaces. So we limited the MEDLINE search to 'workplaces' and 'office work', and it served our needs to pick up relevant studies, while leaving out those without an occupational focus.

As for the engineering computer science literature, we were more interested in design-related findings (e.g. usability, UX and technical feasibility) about SB interventions or SB reduction component in interventions intended for other purposes (e.g. screen break, lifestyle change, weight loss) we decided to expand the Compendex/Scopus/ACM search to include SB-related interventions not explicitly targeting office workers or workplace SB and made sure only interventions with components that actually addressed SB at work and tested with a sample that included at least 1 office worker were included during manual screening.
